# Supplementary material
Source: Springer Nature journal article supplement (https://www.springermedizin.de/resource/supplementary/12879_2012_2504_MOESM5_ESM.pdf/9444708)
Supplement: MOESM5 [file 9444708]

Outpatient clinic attendees

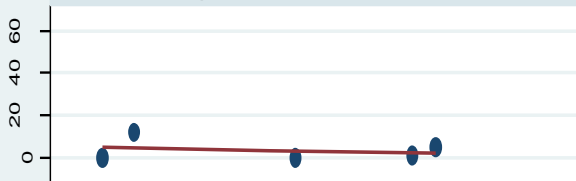

Antenatal clinic attendees

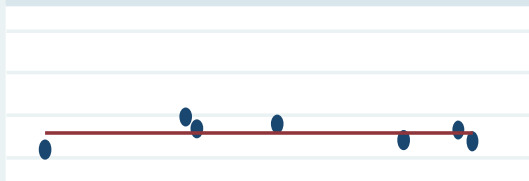

Blood donors

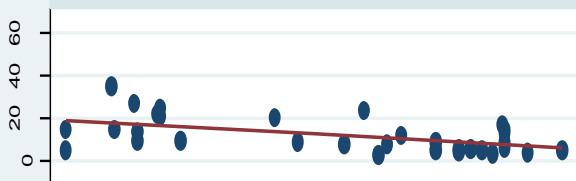

Rural village residents

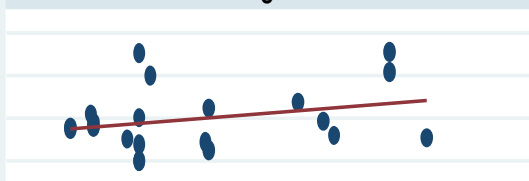

Children

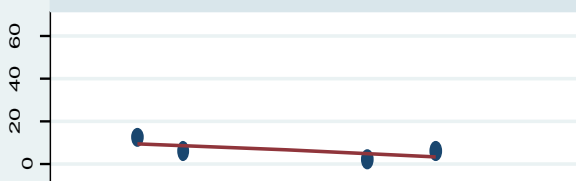

Healthy populations

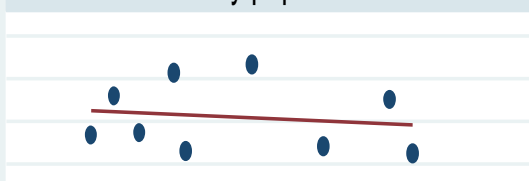

Army recruits/ Fire brigade personnel

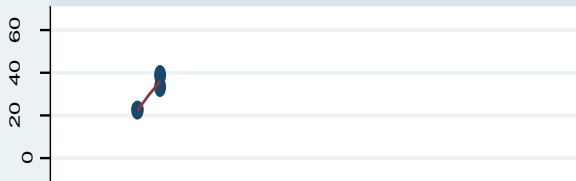

Other general populations

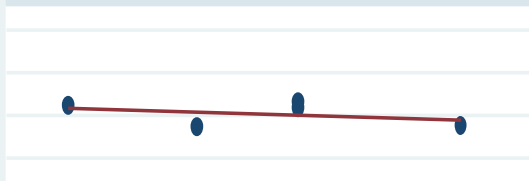

Time (years)

● seroprevalence (%)

— Fitted values
